# Supplementary material for: Carbon reserves in coffee agroforestry in the Peruvian Amazon
Source: Frontiers journal article supplement (doi:10.3389/fpls.2024.1410418), 2024-12-12
Supplement: Data_Sheet_1.PDF [file Data_Sheet_1.PDF]

## Supplementary Material

### 1 Supplementary Data

Does not apply.

### 2 Supplementary Figures and Tables

#### 2.1 Supplementary Figures

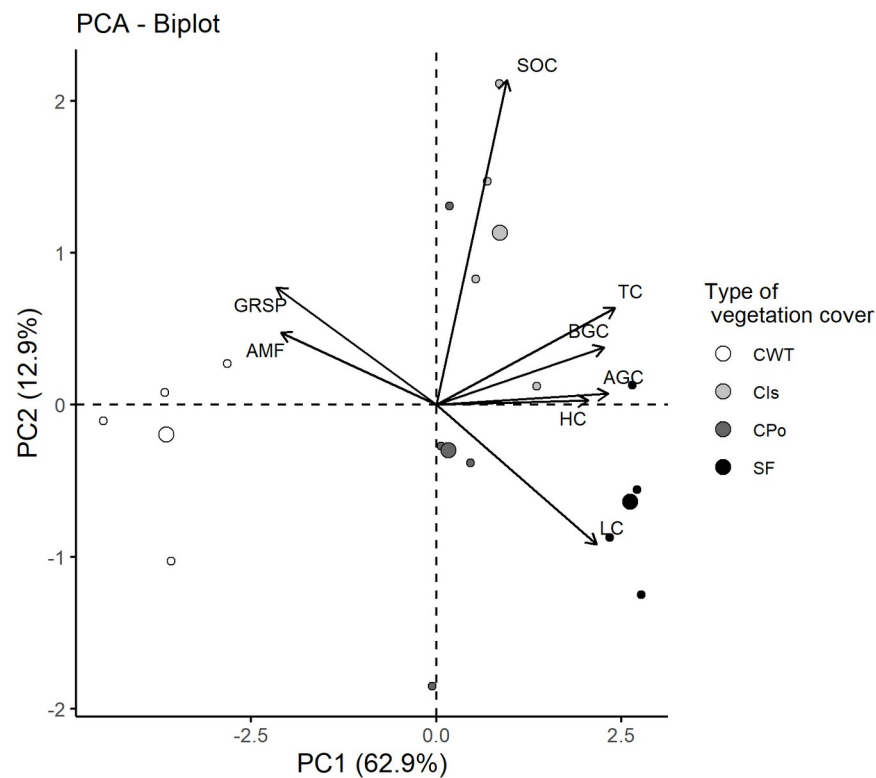

**Supplementary Figure 1.** Principal Component Analysis of glomalin and mycorrhizae with carbon components. CWT: Coffee without shade trees; CIs: Coffee with *Inga* sp. shade trees; CPo: Coffee with polyculture farming; SF: secondary forest. AGC: aboveground carbon; HC: herbaceous carbon; LC: leaf litter carbon; BGC: belowground carbon; SOC: soil organic carbon; TC: Total carbon. GRSP: Glomalin Related Soil Proteins; AMF: Number of Arbuscular Mycorrhizal fungal spores.

# Supplementary Material

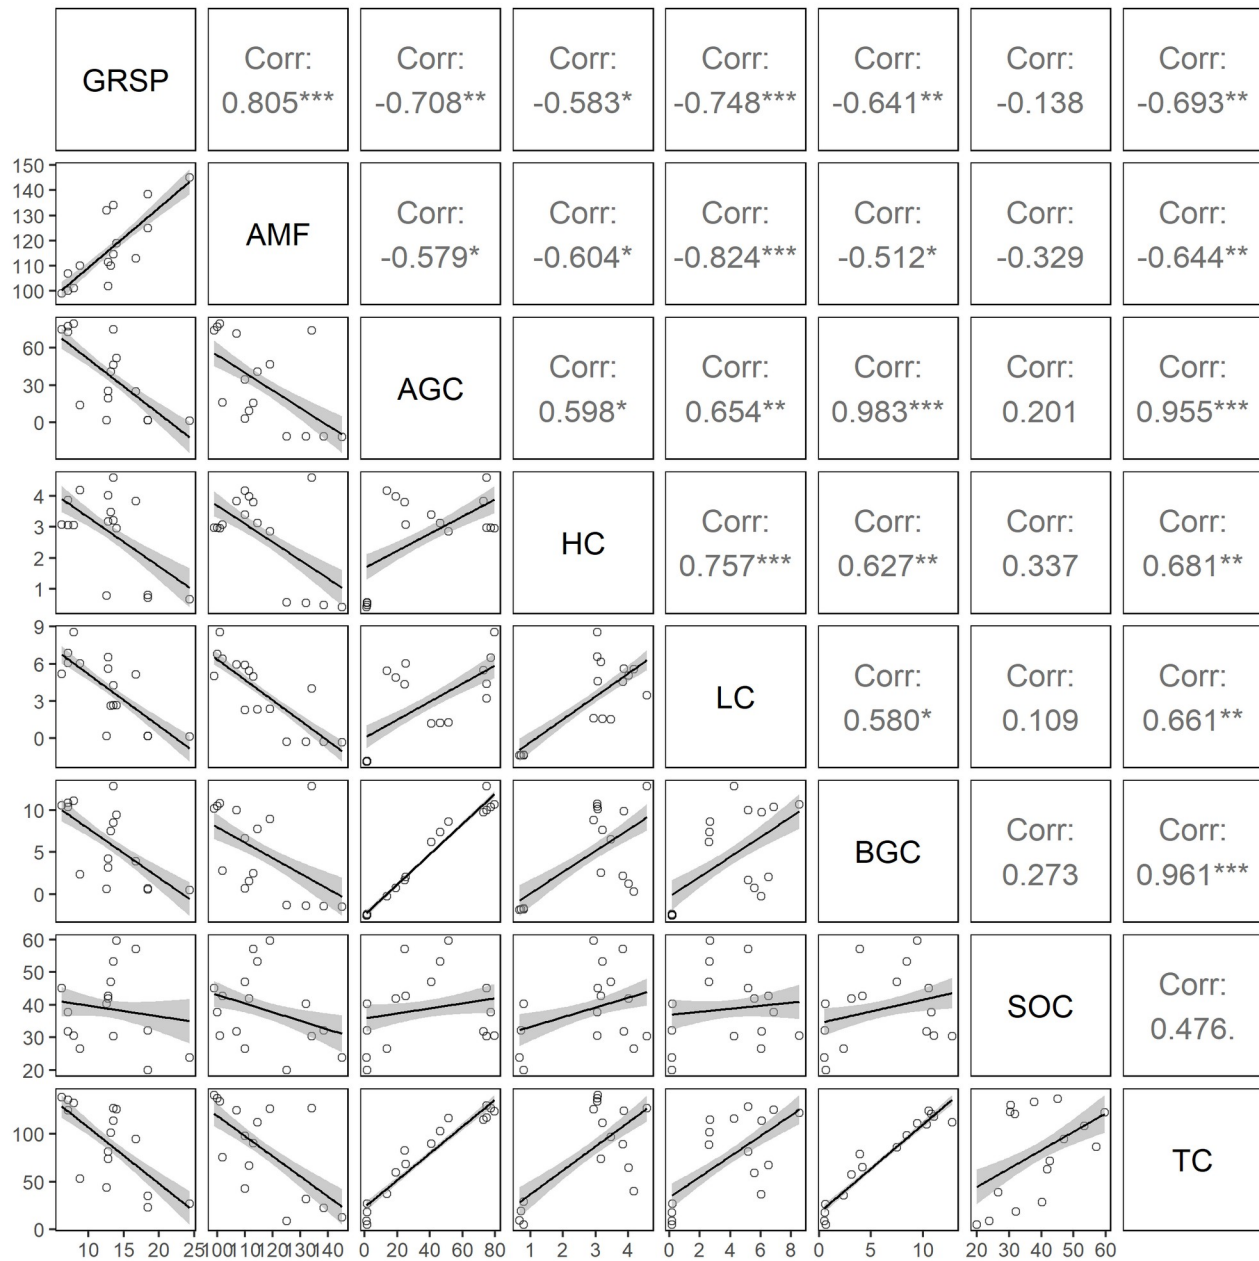

**Supplementary Figure 2.** Correlogram showing correlation coefficients between Glomalin Related Soil Proteins (GRSP) and number of Arbuscular Mycorrhizal Fungal (AMF) spores per 25 g of soil with carbon components. AGC: aboveground carbon; HC: herbaceous carbon; LC: leaf litter carbon; BGC: belowground carbon; SOC: soil organic carbon; TC: Total carbon;

**Supplementary Table 1.** Allometric equations used to estimate aboveground and belowground biomass.

| Group of species      | Barometric model                                                      | r <sup>2</sup> | DBH range (cm)          | References                       |
|-----------------------|-----------------------------------------------------------------------|----------------|-------------------------|----------------------------------|
| Tropical rainforest   | AGB = exp (-1.7689 + 2.377 × Ln (DBH))                                | 0.96           | 2 ≤ DBH < 5             | Nascimento and Laurance (2002)   |
| Tropical rainforest   | AGB = 0.0673 × (ρ × DBH <sup>2</sup> × H) <sup>0.976</sup>            |                | 5 ≤ DBH                 | Chave <i>et al.</i> (2014)       |
| <i>Inga sp.</i>       | AGB = 0.01513 × DBH <sup>3.0054</sup>                                 | 0.83           | 10 ≤ DBH ≤ 29           | Castellanos <i>et al.</i> (2010) |
| <i>Coffea arabica</i> | Ln (AGB) = -2.39287 + 0.95285 × Ln(d <sub>15</sub> ) + 1.2693 × Ln(H) | 0.63           | 0 ≤ d <sub>15</sub> ≤ 9 | Suarez (2004)                    |
| Roots                 | Y = exp (-1.0587 + 0.8836 × Ln (AGB))                                 | 0.84           | -                       | Cairns <i>et al.</i> (1997)      |

AGB: aboveground biomass; Y: root biomass; DBH: diameter at breast height (1.3 meters); d<sub>15</sub>: diameter at 15 cm above ground; H: height (m); and ρ: wood density.
